# Supplementary material for: Maize plants can enter a standby mode to cope with chilling stress
Source: PubMed Central journal article supplement (PMC5050578; doi:10.1186/s12870-016-0909-y), 2016-10-04

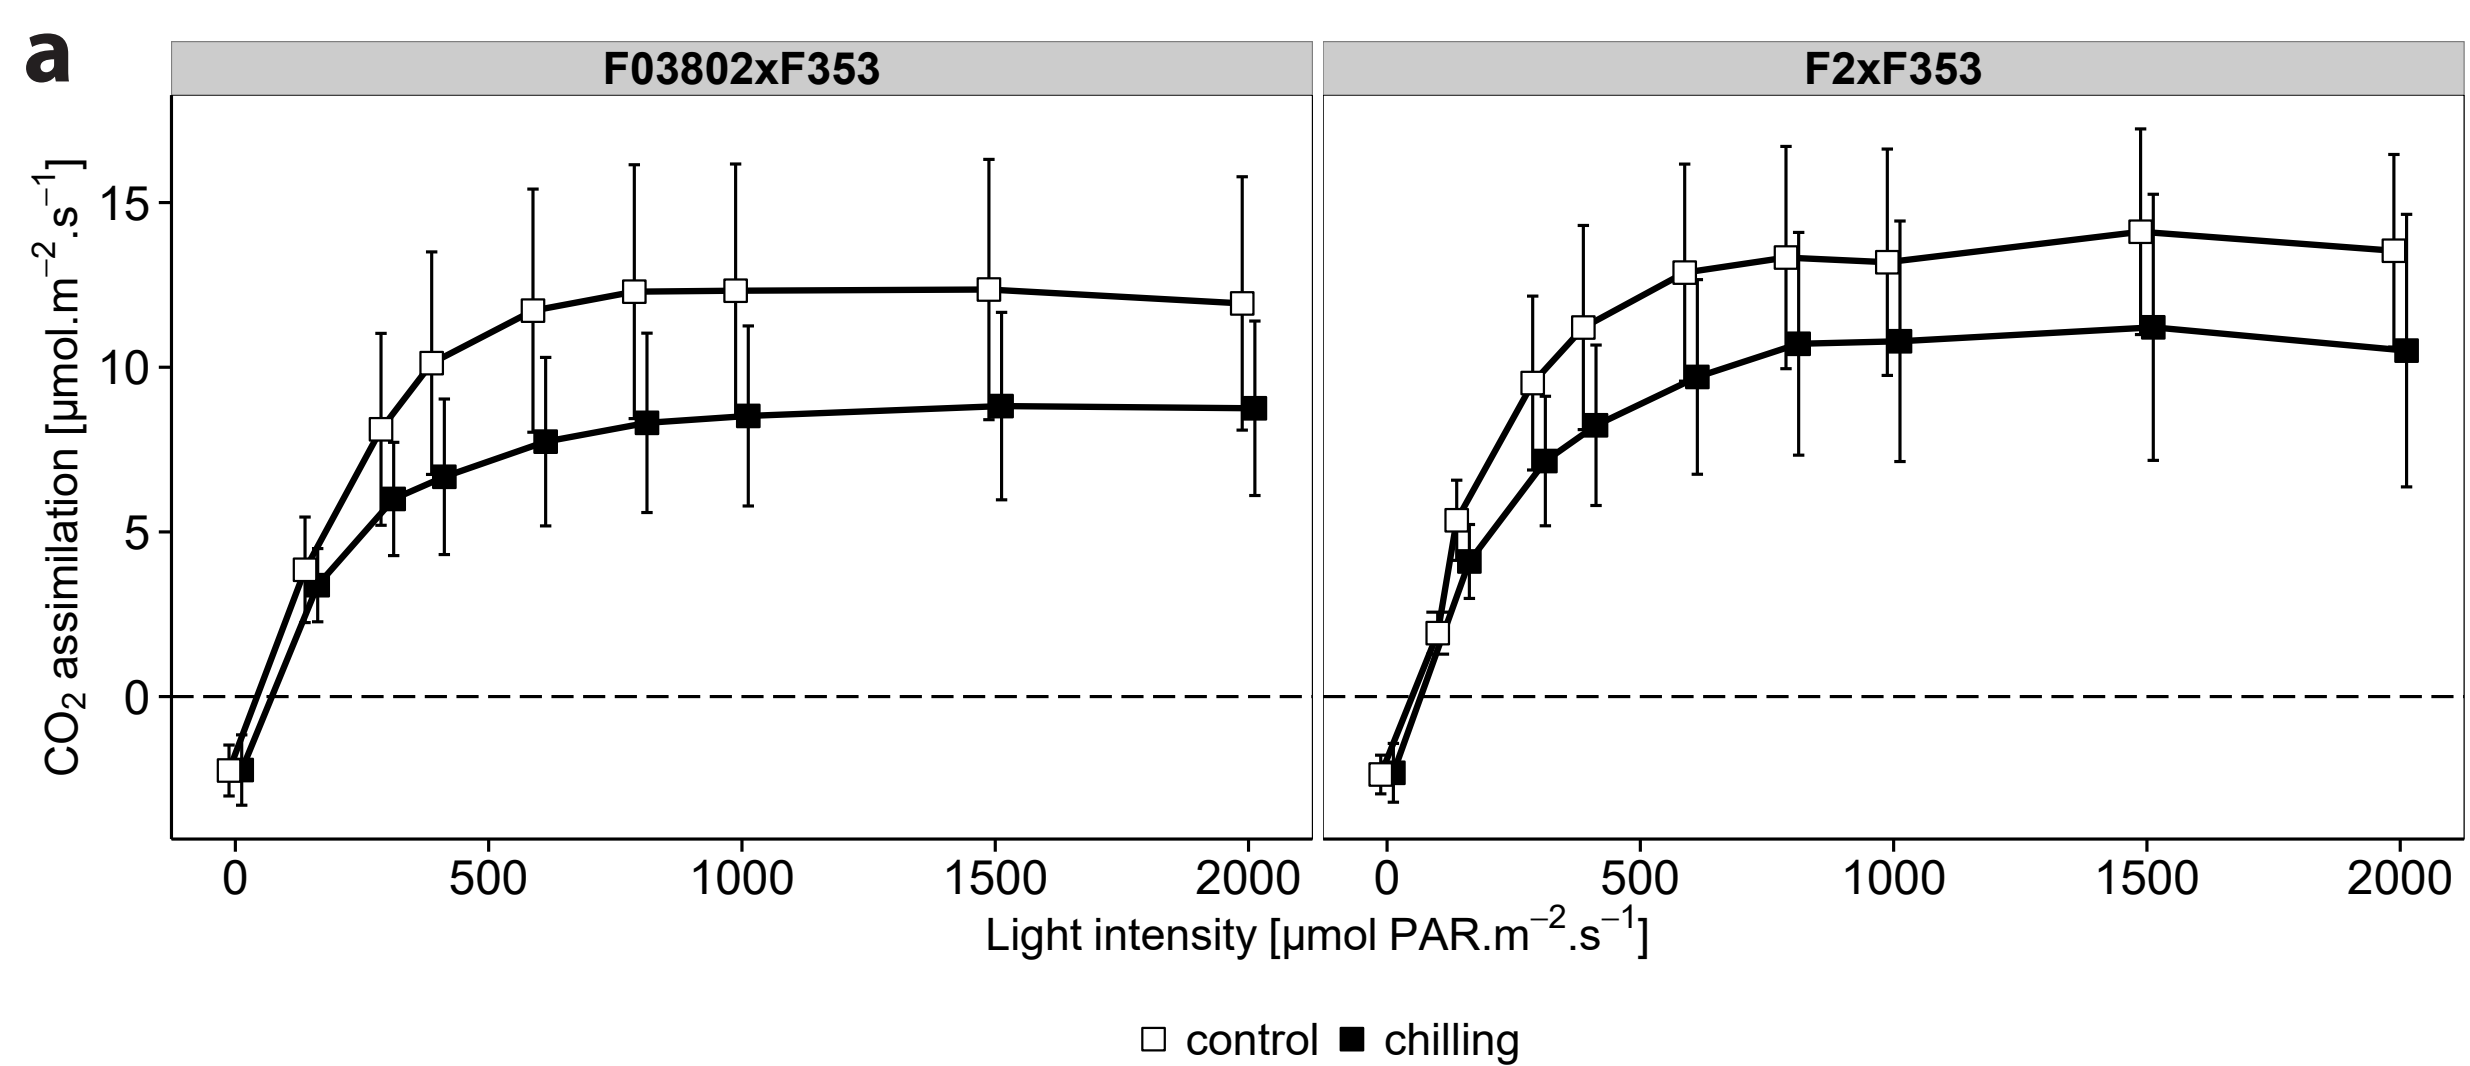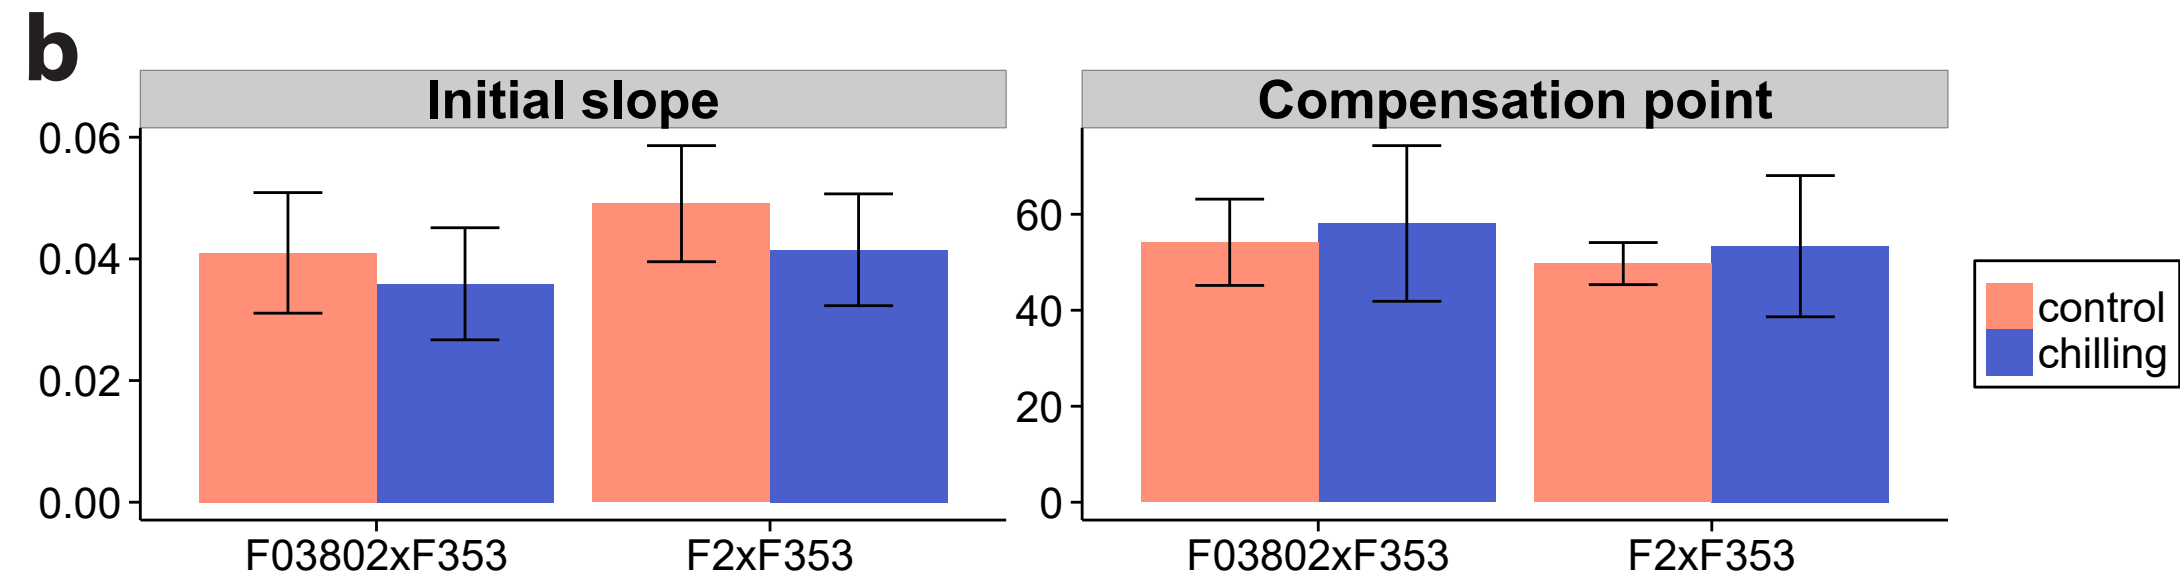

Supplement: 12870_2016_909_MOESM3_ESM.pdf [file 12870_2016_909_MOESM3_ESM.pdf]
